# Supplementary material for: Luminescence and structural properties of lanthanide complexes of Schiff bases derived from pyridoxal and amino acids
Source: Royal Society of Chemistry journal article supplement (doi:10.1039/b706020c), 2007-01-01
Supplement: b706020c.pdf [file b706020c.pdf]

Electronic Supplementary Information for Dalton Transactions  
This journal is © The Royal Society of Chemistry 2007

**Luminescence and structural properties of lanthanide complexes of Schiff bases derived from pyridoxal and amino acids**

Lada Puntus,<sup>\*a</sup> Konstantin Zhuravlev,<sup>a</sup> Konstantin Lyssenko,<sup>b</sup> Mikhail Antipin<sup>b</sup> and  
Irina Pekareva<sup>a</sup>

**Electronic Supplementary Information**

(5 pages)

Table S 1. Observed crystal-field sub-levels ( $\text{cm}^{-1}$ ) in 1:1 and 1:2  $\text{Eu}^{\text{III}}$  complexes with PL-Asp and PL-His respectively, as determined from high resolution luminescence spectra at 77 K. The  ${}^7\text{F}_0$  level is taken as the origin.

| Level            | 1:1  | 1:2  |
|------------------|------|------|
| ${}^7\text{F}_1$ | 197  | 288  |
|                  | 224  | 402  |
|                  | 255  | 414  |
|                  | 387  |      |
|                  | 517  |      |
| ${}^7\text{F}_2$ | 927  | 920  |
|                  | 1044 | 942  |
|                  | 1174 | 932  |
|                  |      | 1067 |
| ${}^7\text{F}_3$ | 1849 | 1844 |
|                  | 1905 | 1891 |
|                  | 1924 | 1912 |
|                  | 1952 | 1979 |
|                  | 1996 |      |
|                  | 2057 |      |
| ${}^7\text{F}_4$ | 2667 | 2767 |
|                  | 2707 | 2917 |
|                  | 2831 | 2932 |
|                  | 2889 | 2967 |
|                  | 2937 | 3057 |
|                  | 2965 |      |
|                  | 3016 |      |
|                  | 3091 |      |
|                  | 3038 |      |
| 3109             |      |      |

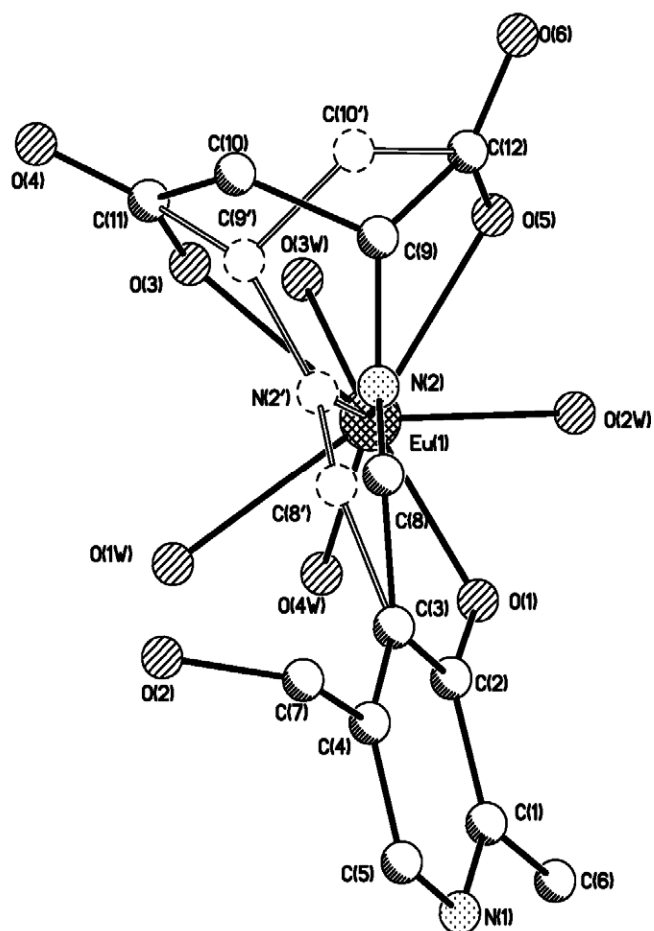

Figure S 1. The superposition of two enantiomers in crystal of complex **1**. The minor part (s.o.f. 0.198(6)) is shown by dashed lines. The hydrogen atoms are omitted for clarity.

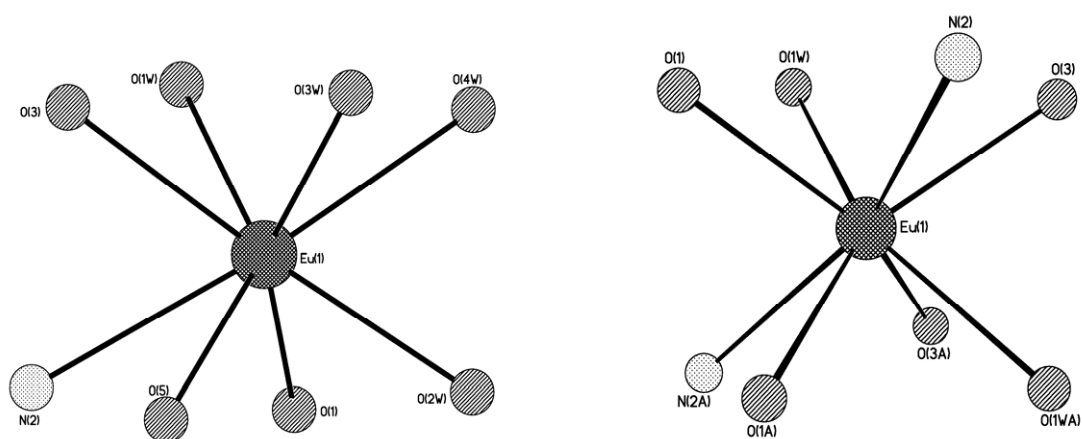

Figure S 2. The polyhedron of  $\text{Eu}^{\text{III}}$  in the crystals of **1** (left) and **2** (right) complexes.

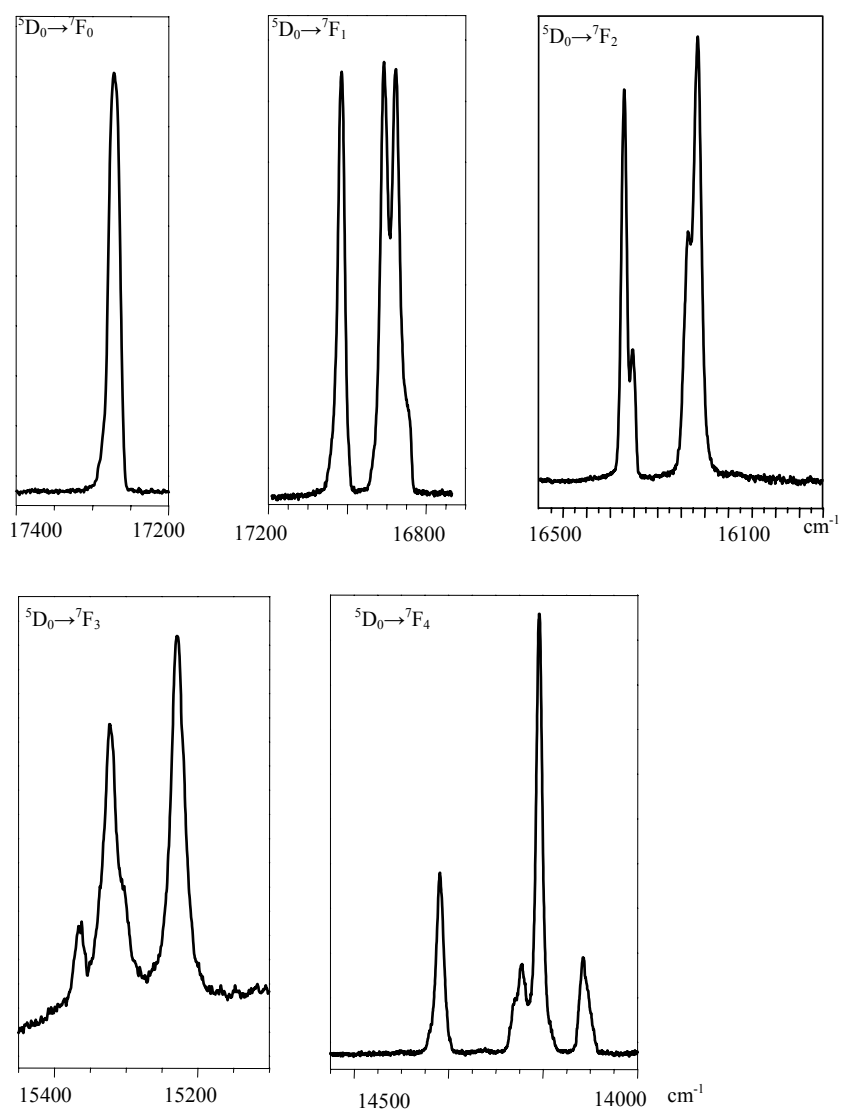

Figure S 3. Parts of high resolution luminescence spectrum of  $[\text{Eu}(\text{PL-His})_2(\text{H}_2\text{O})_2]\text{Cl}(\text{H}_2\text{O})_4$  (**2**) at 77K in the region of europium electronic transitions

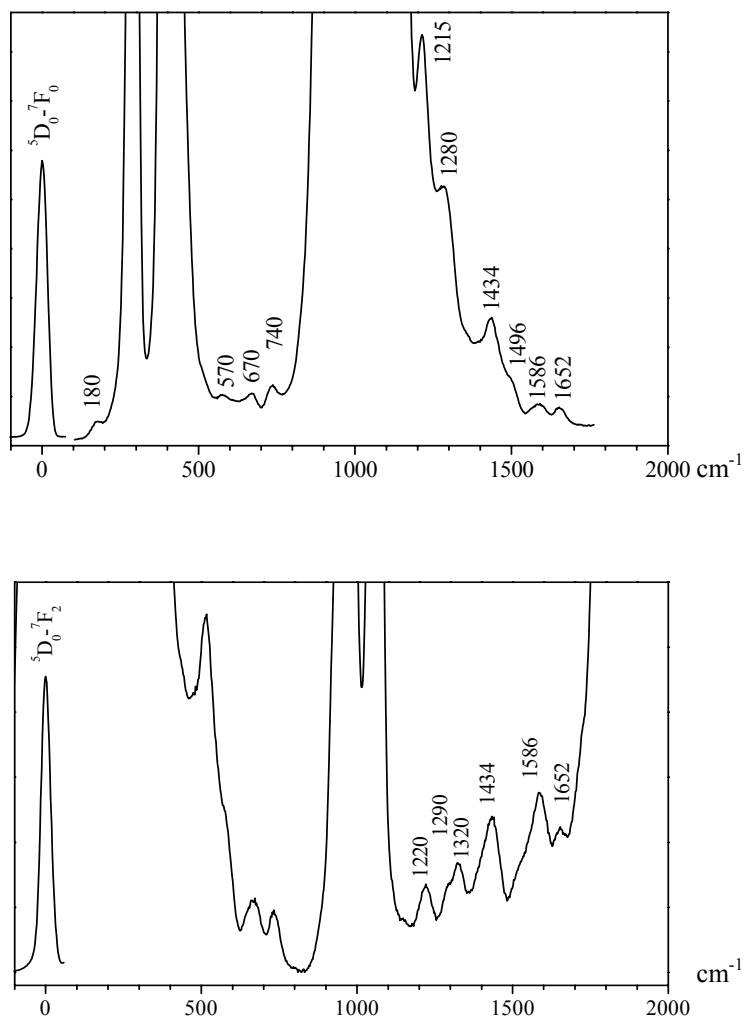

Figure S 4. Part of luminescence spectra of [Eu(PL-His)<sub>2</sub>(H<sub>2</sub>O)<sub>2</sub>]Cl(H<sub>2</sub>O)<sub>4</sub> (**2**) in the region of vibronic satellites of  $^5D_0 \rightarrow ^7F_0$  (top) and  $^5D_0 \rightarrow ^7F_2$  (bottom) transitions at 77 K
